# Supplementary material for: The microRNA miR-29c-5p inhibits cell proliferation and migration by targeting TMEM98 in head and neck carcinoma
Source: publisher site journal article supplement (doi:10.18632/aging.202183), 2020-11-26
Supplement: Supplementary file 1 [file aging-v13i1-202183-supplementary-material-SD1.pdf]

**SUPPLEMENTARY FIGURE**

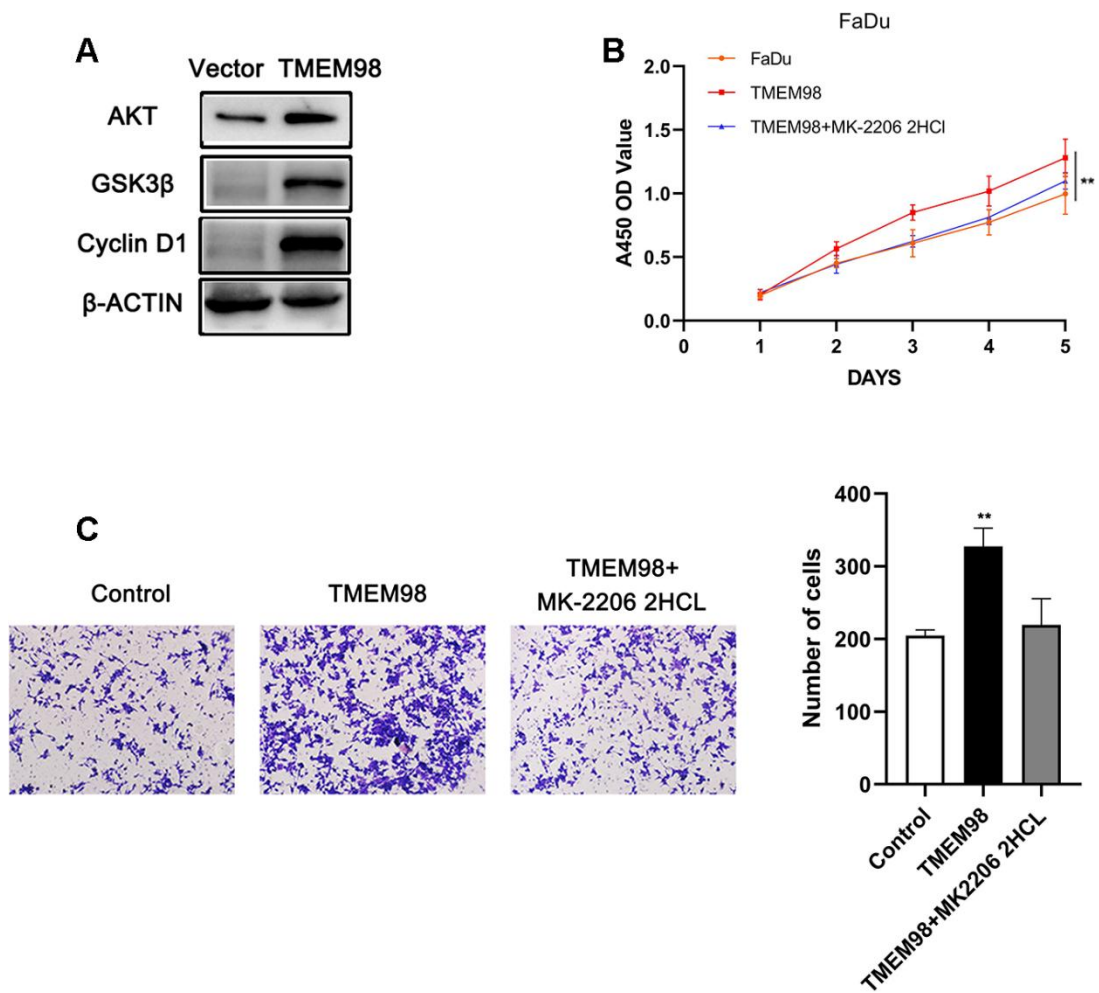

**Supplementary Figure 1. MiR-29c-5p-TMEM98 might regulate HNSCC cells' proliferation and migration via AKT/GSK3β /Cyclin D1 signaling.** (A) The expression level of AKT/GSK3β /Cyclin D1 was significantly elevated in HNSCC cells transfected with TMEM98 over-expression plasmid. (B) The inhibitor of AKT signaling, MK-2206 2HCL, reversed the enhanced effect of TMEM98 on proliferation ability in HNSCC cells. (C) The enhanced migration ability of TEME98 over-expression HNSCC cells was reversed after the treatment of MK-2206 2HCL. \*p < 0.05, \*\*p < 0.01.
